# Supplementary material for: Systemic Medication and Intraocular Pressure in a British Population: The EPIC-Norfolk Eye Study
Source: PubMed Central journal article supplement (PMC4109027; doi:10.1016/j.ophtha.2014.02.009), 2014-08
Supplement: mmc2.pdf [file mmc2.pdf]

**Appendix 2:** Table showing results from multivariable linear regression models with intraocular pressure as the dependent variable.

|                      | No further adjustment   |                |         | Adjusted for nitrate use |                |         | Adjusted for beta-blocker use |                |         |
|----------------------|-------------------------|----------------|---------|--------------------------|----------------|---------|-------------------------------|----------------|---------|
|                      | $\beta$                 | 95% CI         | p-value | $\beta$                  | 95% CI         | p-value | $\beta$                       | 95% CI         | p-value |
| <b>Nitrates</b>      | -1.04                   | (-1.51, -0.58) | <0.001  | -                        | -              | -       | -0.69                         | (-1.17, -0.21) | 0.005   |
| <b>Beta-blockers</b> | -1.04                   | (-1.30, -0.79) | <0.001  | -0.97                    | (-1.23, -0.71) | <0.001  | -                             | -              | -       |
| <b>Statins</b>       | -0.29                   | (-0.50, -0.09) | 0.003   | -0.21                    | (-0.42, -0.00) | 0.045   | -0.11                         | (-0.31, 0.10)  | 0.31    |
| <b>Aspirin</b>       | -0.42                   | (-0.64, -0.20) | <0.001  | -0.33                    | (-0.55, -0.11) | 0.004   | -0.21                         | (-0.43, 0.02)  | 0.07    |
|                      | Adjusted for statin use |                |         | Adjusted for aspirin use |                |         |                               |                |         |
|                      | $\beta$                 | 95% CI         | p-value | $\beta$                  | 95% CI         | p-value |                               |                |         |
| <b>Nitrates</b>      | -0.94                   | (-1.42, -0.47) | <0.001  | -0.89                    | (-1.37, -0.41) | <0.001  |                               |                |         |
| <b>Beta-blockers</b> | -1.01                   | (-1.27, -0.75) | <0.001  | -0.98                    | (-1.25, -0.72) | <0.001  |                               |                |         |
| <b>Statins</b>       | -                       | -              | -       | -0.17                    | (-0.39, 0.05)  | 0.13    |                               |                |         |
| <b>Aspirin</b>       | -0.35                   | (-0.59, -0.11) | 0.004   | -                        | -              | -       |                               |                |         |

All regression models were adjusted for age, sex and body mass index, and further adjusted for a particular medication as shown. Each row within each section represents a different regression model.

CI – confidence interval.
